# Supplementary material for: Genetic Analyses of Enamel Hypoplasia in Multiethnic Cohorts
Source: PubMed Central journal article supplement — Hum Hered. 2022 Feb 16;87(2):34–50. Online ahead of print. doi: 10.1159/000522642 (PMC9378791; doi:10.1159/000522642), 2022-02-16

# Genetic Analyses of Enamel Hypoplasia in Multiethnic Cohorts

## Supplementary Materials

Rasha N. Alotaibi<sup>1,2,3</sup>, Brian J. Howe<sup>4</sup>, Lina M. Moreno Uribe<sup>5,6</sup>, Carla Sanchez<sup>2,3</sup>, Frederic W.B. Deleyiannis<sup>7</sup>, Carmencita Padilla<sup>8</sup>, Fernando A. Poletta<sup>9</sup>, Ieda M. Orioli<sup>10</sup>, Carmen J. Buxó<sup>11</sup>, George L. Wehby<sup>12</sup>, Alexandre R. Vieira<sup>2</sup>, Jeffrey C. Murray<sup>13</sup>, Consuelo Valencia-Ramírez<sup>14</sup>, Claudia P. Restrepo Muñeton<sup>14</sup>, Ross E. Long<sup>15</sup>, John R. Shaffer<sup>2,3,16</sup>, Steven E. Reis<sup>17</sup>, Seth M. Weinberg<sup>2,3</sup>, Katherine Neiswanger<sup>2,3</sup>, Daniel W. McNeil<sup>18</sup>, Mary L. Marazita<sup>2,3,16</sup>

<sup>1</sup>Dental Health Department, College of Applied Medical Sciences, King Saud University, Riyadh, Saudi Arabia

<sup>2</sup>Department of Oral and Craniofacial Sciences, School of Dental Medicine, University of Pittsburgh, Pittsburgh, PA, United States

<sup>3</sup>Center for Craniofacial and Dental Genetics, School of Dental Medicine, University of Pittsburgh, Pittsburgh, PA, United States

<sup>4</sup>Department of Family Dentistry, College of Dentistry, University of Iowa, Iowa City, IA, United States

<sup>5</sup>The Iowa Institute for Oral Health Research, College of Dentistry, University of Iowa, Iowa City, IA, United States

<sup>6</sup>Department of Orthodontics, School of Dentistry, University of Iowa, Iowa City, IA, United States

<sup>7</sup>UCHealth Medical Group, Colorado Springs, CO, United States

<sup>8</sup>Department of Pediatrics, College of Medicine, University of the Philippines, Manila

<sup>9</sup>ECLAMC / INAGEMP CEMIC, Dirección de Investigación A.Galván, Buenos Aires, Argentina

<sup>10</sup>Department of Genetics, Institute of Biology, Federal University of Rio de Janeiro, Rio de Janeiro, Brazil

<sup>11</sup>School of Dental Medicine, University of Puerto Rico, San Juan, Puerto Rico

<sup>12</sup>Department of Health Management and Policy, College of Public Health, University of Iowa, Iowa City, IA, United States

<sup>13</sup>Department of Pediatrics, University of Iowa, Iowa City, IA, USA

<sup>14</sup>Clinica Noel Medellín, Colombia

<sup>15</sup>Lancaster Cleft Palate Clinic, Lancaster, PA, United States

<sup>16</sup>Department of Human Genetics, Graduate School of Public Health, University of Pittsburgh, Pittsburgh, PA, United States

<sup>17</sup>Clinical and Translational Science Institute, and Department of Medicine, School of Medicine, University of Pittsburgh, Pittsburgh, PA, United States

<sup>18</sup>Department of Psychology, Eberly College of Arts and Sciences, and Department of Dental Practice & Rural Health, School of Dentistry, West Virginia University, Morgantown, WV, United States

**Table S1.** DNA collection, storage, Genotyping and dbGaP accessions numbers

|                                                                                                                                       | <b>POFC</b>                                         | <b>COHRA1</b>                                                                                                                                               | <b>COHRA2 and Dental SCORE</b>                      |
|---------------------------------------------------------------------------------------------------------------------------------------|-----------------------------------------------------|-------------------------------------------------------------------------------------------------------------------------------------------------------------|-----------------------------------------------------|
| <b>DNA Collection</b>                                                                                                                 | Saliva (Oragene)                                    | Blood samples were the priority, but saliva (Oragene), cheek swab (Oragene), or mouthwash buccal cell samples were taken if blood samples were not possible | Saliva or Cheek Swabs (Oragene)                     |
| <b>DNA Storage</b>                                                                                                                    | Saliva (Oragene) samples stored at room temperature | Blood samples and mouthwash samples are refrigerated at 4 degrees Celcius. Saliva (Oragene) samples stored at room temperature                              | Saliva (Oragene) samples stored at room temperature |
| <b>Genotyping Chip</b>                                                                                                                | Illumina HumanCore+Exome array                      | Illumina Human610-Quad Beadchip                                                                                                                             | Illumina Human610-Quad Beadchip                     |
| <b>Genotyped SNPs</b>                                                                                                                 | 557,677 SNPs                                        | 620,901 SNPs                                                                                                                                                | 17,482,50 SNPs                                      |
| <b>Total SNPs</b>                                                                                                                     | 32,630,291 SNPs (Genotyped + imputed)               | 16,219,283 SNPs (Genotyped + imputed)                                                                                                                       | 40,405,505 SNPs                                     |
| <b>dbGaP accession numbers</b><br><a href="https://www.ncbi.nlm.nih.gov/gap/accession">https://www.ncbi.nlm.nih.gov/gap/accession</a> | phs000774.v2.p1                                     | phs000095.v3.p1                                                                                                                                             | phs001591.v1.p1                                     |

---

**Table S2. Data Collection**

---

|                             | <b>POFC</b>                                                                                                                         | <b>COHRA1, COHRA2 and Dental SCORE</b>                                                                                                                                                                                    |
|-----------------------------|-------------------------------------------------------------------------------------------------------------------------------------|---------------------------------------------------------------------------------------------------------------------------------------------------------------------------------------------------------------------------|
| <b>Questionnaire</b>        | Self-reported questionnaires                                                                                                        | Self-reported questionnaires                                                                                                                                                                                              |
| <b>Dental Exam</b>          | In-person dental exams<br>Trained and calibrated dental examiners<br>Intraoral photos: 5 photographs<br>Trained calibrated examiner | In-person dental exams<br>Trained and calibrated dental examiners                                                                                                                                                         |
| <b>Years of Examination</b> | 2006-2016                                                                                                                           | COHRA1: 2003 – 2009<br>Dental Score: 2007 – 2010<br>COHRA2: 2011 and is ongoing                                                                                                                                           |
| <b>IRB</b>                  | Pitt:CR19080127-00<br>Site:CR19030367-003                                                                                           | COHRA1:<br>Pitt: CR19030392-001<br>Coordinating Site: CR19100225-001<br>WV : 1411480509A022<br>DentalSCORE: MOD19110210-001<br>COHRA2:<br>Pitt: CR19110013-002<br>Coordinating Site: CR19080178-001<br>WV: 1411480509A022 |

---

**Table S3 . Meta-analysis Results with Heterogeneity Statistics**

| <b>SNP</b> | <b>Chr</b> | <b>BP</b> | <b>Meta-P</b> | <b>Direction</b> | <b>Het I<sup>2</sup></b> | <b>Het Q</b> | <b>Het Df</b> | <b>Het P*</b> |
|------------|------------|-----------|---------------|------------------|--------------------------|--------------|---------------|---------------|
| rs1359694  | 9          | 9531084   | 5.86E-07      | ----             | 0                        | 2.947        | 3             | 0.3999        |
| rs12830414 | 12         | 78827822  | 6.07E-07      | ++++             | 32.6                     | 4.45         | 3             | 0.2168        |
| rs682846   | 19         | 50696240  | 6.36E-07      | ----             | 0                        | 0.366        | 3             | 0.9471        |
| rs4649222  | 1          | 233491437 | 1.83E-06      | ++++             | 0                        | 1.107        | 3             | 0.7755        |
| rs2840075  | 4          | 71992629  | 2.20E-06      | ----             | 50.2                     | 6.021        | 3             | 0.1106        |
| rs62196465 | 20         | 15611956  | 2.80E-06      | ----             | 40.7                     | 5.063        | 3             | 0.1672        |
| rs16968212 | 15         | 76724882  | 2.92E-06      | ++++             | 0                        | 2.658        | 3             | 0.4473        |
| rs9846530  | 3          | 122651543 | 3.69E-06      | ----             | 58.3                     | 7.191        | 3             | 0.06606       |
| rs7921002  | 10         | 80887721  | 4.10E-06      | ----             | 11.1                     | 3.374        | 3             | 0.3375        |

Het I<sup>2</sup>: measure of inconsistency

Het Q: Cochran's Q measure of heterogeneity

\*Significant heterogeneity based on Q is p<0.10

**Table S4 . Lead SNPs from all Cohorts in the Meta-analysis Results**

| Cohort       | SNP         |    |           |           |      | POFC            |         | COHRA1          |         | COHRA2          |         | Dental SCORE    |         |
|--------------|-------------|----|-----------|-----------|------|-----------------|---------|-----------------|---------|-----------------|---------|-----------------|---------|
|              | Chr         | BP | Meta-P    | Direction | P    | MAF             | P       | MAF             | P       | MAF             | P       | MAF             |         |
| POFC         | rs12043922  | 1  | 154118497 | 0.03004   | --+  | <b>7.45E-08</b> | 0.06949 | 0.14154593      | 0.05223 | 0.00494044      | 0.05761 | 0.76416127      | 0.05761 |
|              | rs9616163   | 22 | 47328584  | 0.0391    | +++  | <b>3.22E-07</b> | 0.06117 | 0.26296264      | 0.09908 | 0.54246182      | 0.09425 | 0.45641165      | 0.09425 |
|              | rs55726235  | 13 | 34022292  | 0.156     | +++  | <b>5.12E-07</b> | 0.06841 | 0.43690116      | 0.09641 | 0.20530252      | 0.1146  | 0.88820188      | 0.1146  |
| COHRA1       | rs62522905  | 8  | 136395352 | 0.06302   | +++  | 0.69309218      | 0.1259  | <b>5.04E-08</b> | 0.1001  | 0.42707949      | 0.0912  | 0.58722706      | 0.0912  |
|              | rs80311444  | 4  | 18789773  | 0.0001425 | --+  | 0.3047191       | 0.06305 | <b>1.26E-07</b> | 0.1122  | 0.90275869      | 0.1029  | 0.15611722      | 0.1029  |
|              | rs3888090   | 19 | 54317914  | 0.0001074 | +++  | 0.11281692      | 0.09921 | <b>2.37E-07</b> | 0.06076 | 0.97033179      | 0.1045  | 0.30281975      | 0.1045  |
|              | rs1893781   | 18 | 42443643  | 0.0032    | +++  | 0.38305603      | 0.183   | <b>3.44E-07</b> | 0.1197  | 0.89445325      | 0.121   | 0.12407199      | 0.121   |
| COHRA2       | rs11232439  | 11 | 80743780  | 0.05053   | --+  | 0.46788552      | 0.1418  | 0.37690971      | 0.08351 | <b>1.24E-08</b> | 0.08397 | 0.86215315      | 0.08397 |
|              | rs57555457  | 14 | 48260934  | 0.001391  | +++  | 0.39836976      | 0.07178 | 0.06628699      | 0.09913 | <b>1.80E-07</b> | 0.06224 | 0.85547366      | 0.06224 |
|              | rs62575356  | 9  | 118497768 | 0.2283    | +++  | 0.09401534      | 0.06158 | 0.40673299      | 0.05443 | <b>2.77E-07</b> | 0.06036 | 0.05959045      | 0.06036 |
|              | rs6539378   | 12 | 108242099 | 0.2427    | --+  | 0.63903735      | 0.1705  | 0.19056993      | 0.06643 | <b>7.15E-07</b> | 0.06561 | 0.3994382       | 0.06561 |
|              | rs11074423  | 16 | 20000021  | 0.001965  | +++  | 0.26231365      | 0.1003  | 0.73307598      | 0.05054 | <b>1.43E-06</b> | 0.0654  | 0.92729066      | 0.0654  |
|              | rs34438514  | 11 | 4744156   | 0.001782  | +++  | 0.57463329      | 0.2526  | 0.13573498      | 0.2111  | <b>2.56E-06</b> | 0.2252  | 0.53846048      | 0.2252  |
| Dental SCORE | rs36010081  | 1  | 212423782 | 0.004492  | ---- | 0.66250882      | 0.09574 | 0.98660941      | 0.1798  | 0.93293181      | 0.1465  | <b>2.67E-07</b> | 0.1465  |
|              | rs7780210   | 7  | 139231244 | 0.1624    | +++  | 0.38514078      | 0.07205 | 0.97561258      | 0.125   | 0.00155775      | 0.1464  | <b>3.06E-07</b> | 0.1464  |
|              | rs13416055  | 2  | 236558145 | 0.04821   | +++  | 0.1055595       | 0.2635  | 0.66633677      | 0.2987  | 0.86679214      | 0.2783  | <b>6.68E-07</b> | 0.2783  |
|              | rs3010205   | 1  | 11440957  | 0.009802  | +++  | 0.77400975      | 0.4632  | 0.21716486      | 0.369   | 0.24720619      | 0.3665  | <b>7.22E-07</b> | 0.3665  |
|              | rs7181456   | 15 | 59577736  | 0.1845    | +++  | 0.63914636      | 0.2661  | 0.0661771       | 0.1804  | 0.97442933      | 0.1764  | <b>8.30E-07</b> | 0.1764  |
|              | rs2395706   | 6  | 38749903  | 0.02698   | +++  | 0.6657175       | 0.3147  | 0.34641182      | 0.2935  | 0.37651867      | 0.3131  | <b>8.97E-07</b> | 0.3131  |
|              | rs182056767 | 23 | 127462931 | 0.007964  | +++  | 0.05878762      | 0.05319 | 0.26404266      | 0.0598  | 0.23916044      | 0.07259 | <b>9.44E-07</b> | 0.07259 |

---

**Table S5. Information on SNPs from GWAS catalog.**

---

| <b>SNP</b> | <b>chr</b> | <b>bp</b> | <b>rsID</b> | <b>PMID</b> | <b>Trait</b>                                  | <b>FirstAuth</b> | <b>Date</b> | <b>P</b> |
|------------|------------|-----------|-------------|-------------|-----------------------------------------------|------------------|-------------|----------|
| rs60167359 | 17         | 57885709  | rs7212590   | 27863252    | Monocyte count                                | Astle WJ         | 2016-11-17  | 2E-30    |
| rs2840075  | 4          | 71991184  | rs11729023  | 30595370    | Heel bone mineral density                     | Kichaev G        | 2018-12-27  | 2E-19    |
| rs60167359 | 17         | 57885709  | rs7212590   | 27863252    | Monocyte percentage of white cells            | Astle WJ         | 2016-11-17  | 4E-19    |
| rs2840075  | 4          | 71991184  | rs11729023  | 30048462    | Heel bone mineral density                     | Kim SK           | 2018-07-26  | 8E-19    |
| rs2840075  | 4          | 71991184  | rs11729023  | 30598549    | Heel bone mineral density                     | Morris JA        | 2018-12-31  | 1E-18    |
| rs60167359 | 17         | 57885709  | rs7212590   | 27863252    | Granulocyte percentage of myeloid white cells | Astle WJ         | 2016-11-17  | 5E-15    |
| rs60167359 | 17         | 57934654  | rs58681483  | 29403010    | Monocyte count                                | Kanai M          | 2018-02-05  | 1E-12    |
| rs2840075  | 4          | 71991184  | rs11729023  | 28869591    | Heel bone mineral density                     | Kemp JP          | 2017-09-04  | 5E-10    |
| rs60167359 | 17         | 57934654  | rs58681483  | 30696823    | Chronotype                                    | Jones SE         | 2019-01-29  | 1E-9     |
| rs1359694  | 9          | 9550389   | rs58823963  | 26545240    | Pelvic organ prolapse (moderate/severe)       | Giri A           | 2015-11-06  | 9E-7     |

---

**Table S6.** Gene Set Enrichment Analyses Results

| <b>Category</b>                   | <b>GeneSet</b>                 | <b>Ngenes</b> | <b>N_overlap</b> | <b>p</b> | <b>adjP</b> | <b>genes</b>              |
|-----------------------------------|--------------------------------|---------------|------------------|----------|-------------|---------------------------|
| Chemical_and_Genetic_perturbation | FARMER_BREAST_CANCER_CLUSTER_5 | 19            | 3                | 7.95E-07 | 0.00262618  | VMP1:TUBD1:RPS6KB1        |
| Positional_gene_sets              | chr17q23                       | 56            | 4                | 2.46E-07 | 6.75E-05    | VMP1:TUBD1:RPS6KB1:RNFT1  |
| Positional_gene_sets              | chr15q24                       | 65            | 4                | 4.52E-07 | 6.75E-05    | ISL2:SCAPER:RCN2:PSTPIP1  |
| Curated_gene_sets                 | FARMER_BREAST_CANCER_CLUSTER_5 | 19            | 3                | 7.95E-07 | 0.0043751   | VMP1:TUBD1:RPS6KB1        |
| TF_targets                        | PAX4_02                        | 235           | 4                | 7.42E-05 | 0.04528779  | ZMIZ1:SLC6A5:SEMA5B:ELMO1 |

**Table S7.** Enamel Genes in Meta-analysis Results

| <b>Gene</b> | <b>SNP</b>       | <b>Chr</b> | <b>BP</b>       | <b>SNP-count</b> | <b>P</b>        | <b>Type</b>    | <b>Sig</b> |
|-------------|------------------|------------|-----------------|------------------|-----------------|----------------|------------|
| <b>ENAM</b> | <b>rs2840075</b> | <b>4</b>   | <b>71992629</b> | <b>7836</b>      | <b>2.20E-06</b> | <b>Imputed</b> | <b>yes</b> |
| TUFT1       | rs6675984        | 1          | 151498624       | 189              | 0.002073        | Imputed        | no         |
| AMBN        | rs34012013       | 4          | 71449613        | 302              | 0.02754         | Imputed        | no         |
| TFIP11      | rs9613203        | 22         | 26945541        | 314              | 0.04368         | Imputed        | no         |
| AMELX       | rs62590037       | 23         | 11259693        | 66               | 0.1152          | Imputed        | no         |

Li and Ji Method for Number of Independent Tests=0.05/279= 0.0001792115=1.79 ×10<sup>04</sup>



| LeadSNP    | chr | pos       | P-value   |
|------------|-----|-----------|-----------|
| rs1359694  | 9   | 9531084   | 5.859e-07 |
| rs12830414 | 12  | 78827822  | 6.067e-07 |
| rs682846   | 19  | 50696240  | 6.358e-07 |
| rs56282801 | 12  | 125459514 | 1.004e-06 |
| rs4649222  | 1   | 233491437 | 1.834e-06 |
| rs2840075  | 4   | 71992629  | 2.196e-06 |
| rs62196465 | 20  | 15611956  | 2.799e-06 |
| rs16968212 | 15  | 76724882  | 2.921e-06 |
| rs9846530  | 3   | 122651543 | 3.691e-06 |
| rs7921002  | 10  | 80887721  | 4.096e-06 |

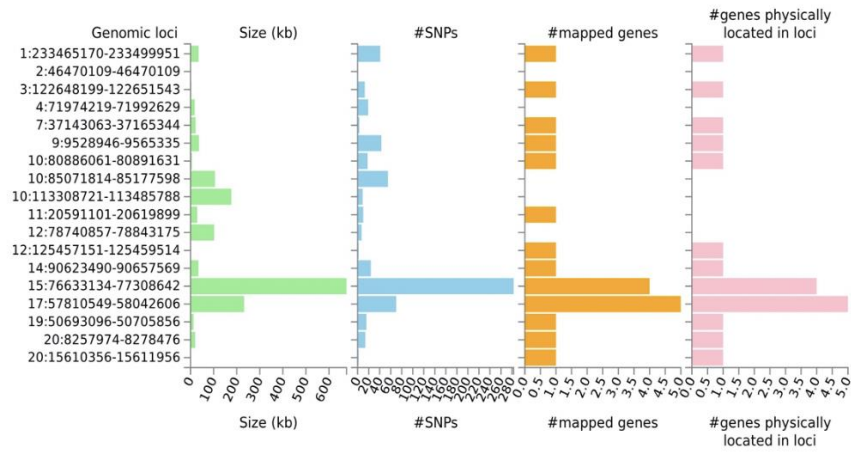

**Figure S1.** FUMA analysis of meta-GWAS results. GWAS risk loci ( $P < 5.0 \times 10^{-6}$ ) with Lead SNPs and FUMA annotations.

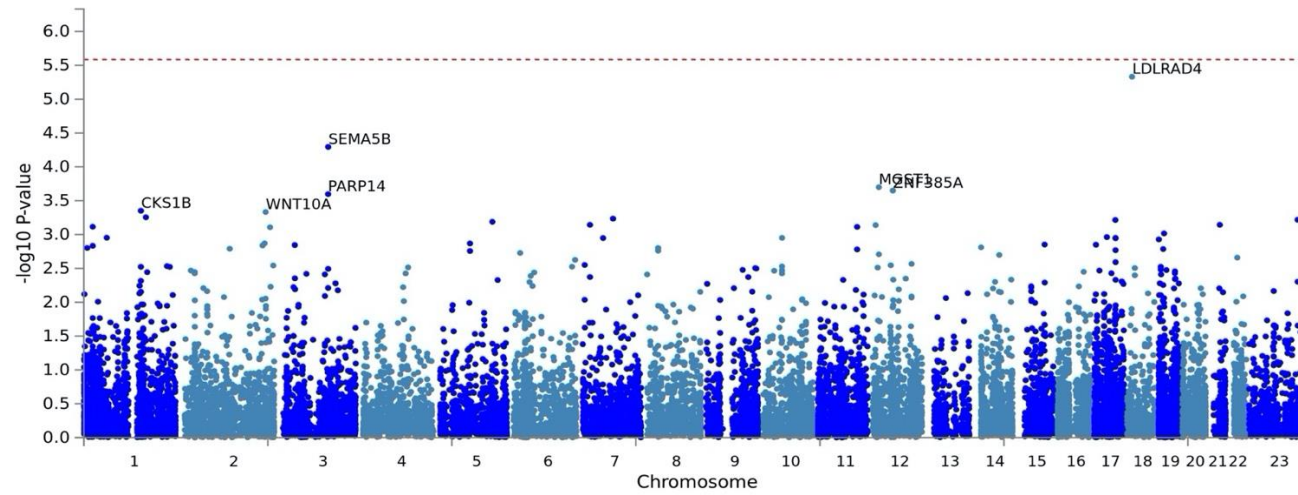

**Figure S2.** Manhattan Plot (gene-based test) of the meta-GWAS results

# Visual Dictionary for Dental Anomalies

Brian J. Howe DMD, MS

Update 03/2016

# General Rules for Scoring Photos

- When permanent tooth is erupting and remnants of primary tooth is still present = say that permanent tooth is present and not the primary tooth.
- If tooth is blurry, and unable to clearly see outline of tooth = not visible
- If teeth are not visible in photo = not visible
- If unable to tell what tooth is present (position of the tooth) = not visible, unable to tell position
- If root tips and unable to tell position of the tooth = not visible/unable to tell position, root tips
- If primary teeth present and permanent first molar and posterior have not erupted = not present – missing age appropriate
- If primary teeth present and permanent first molar erupted, but second permanent molar not erupted = not present – missing age appropriate
- If permanent second molar erupted and permanent canine not erupted = not present, impacted
- If 3<sup>rd</sup> molars are not present, with no history of 3<sup>rd</sup> molar extractions, = not visible

# Hypoplasia

Pits, grooves, or larger areas of missing enamel

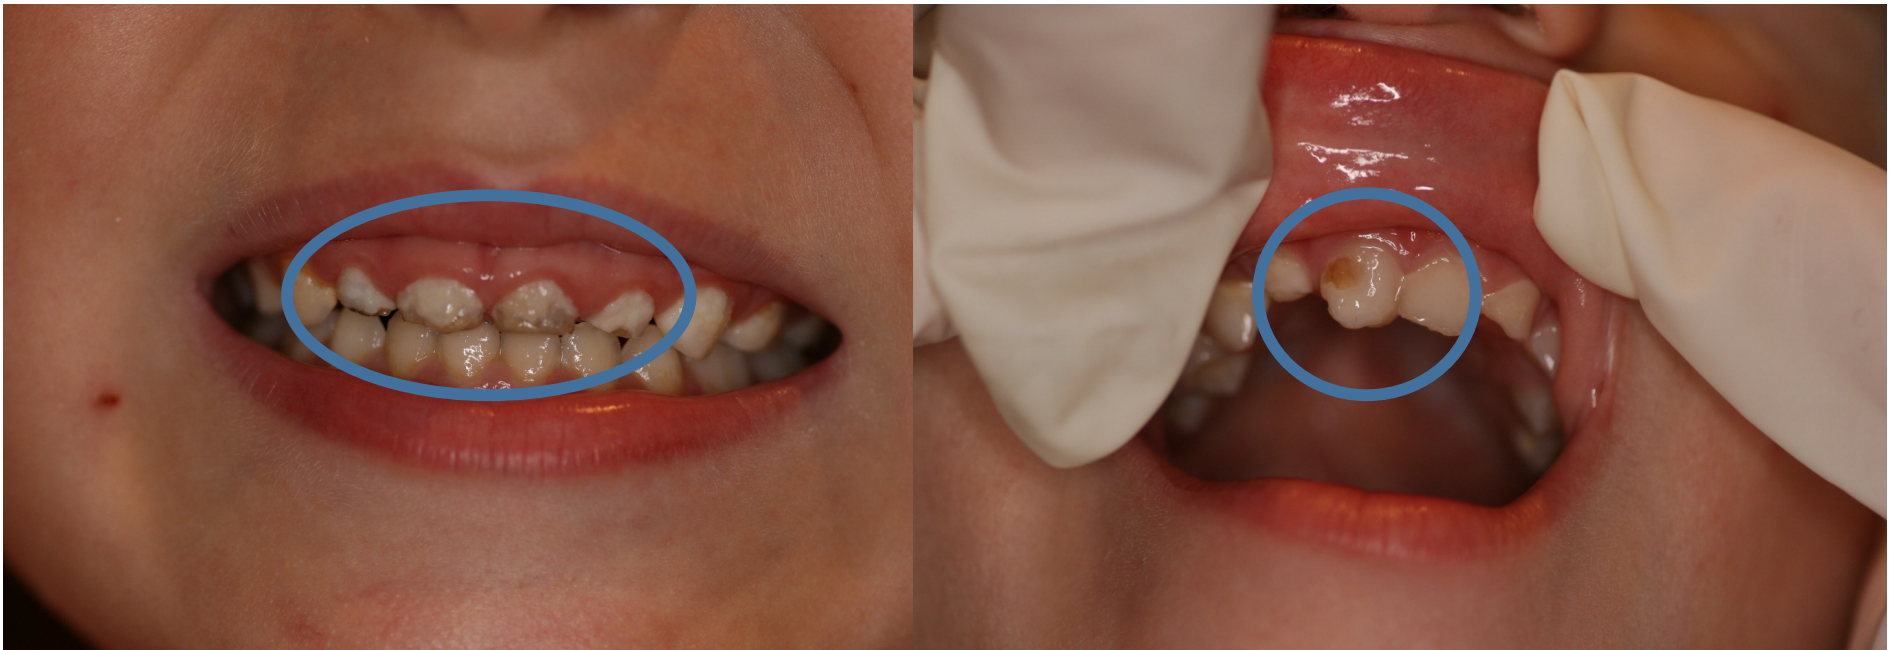

**Hypoplasia: A defect involving the surface of the enamel associated with a reduced thickness of enamel. It can occur in the forms of pits, grooves, or large areas of missing enamel.**

# Hypoplasia

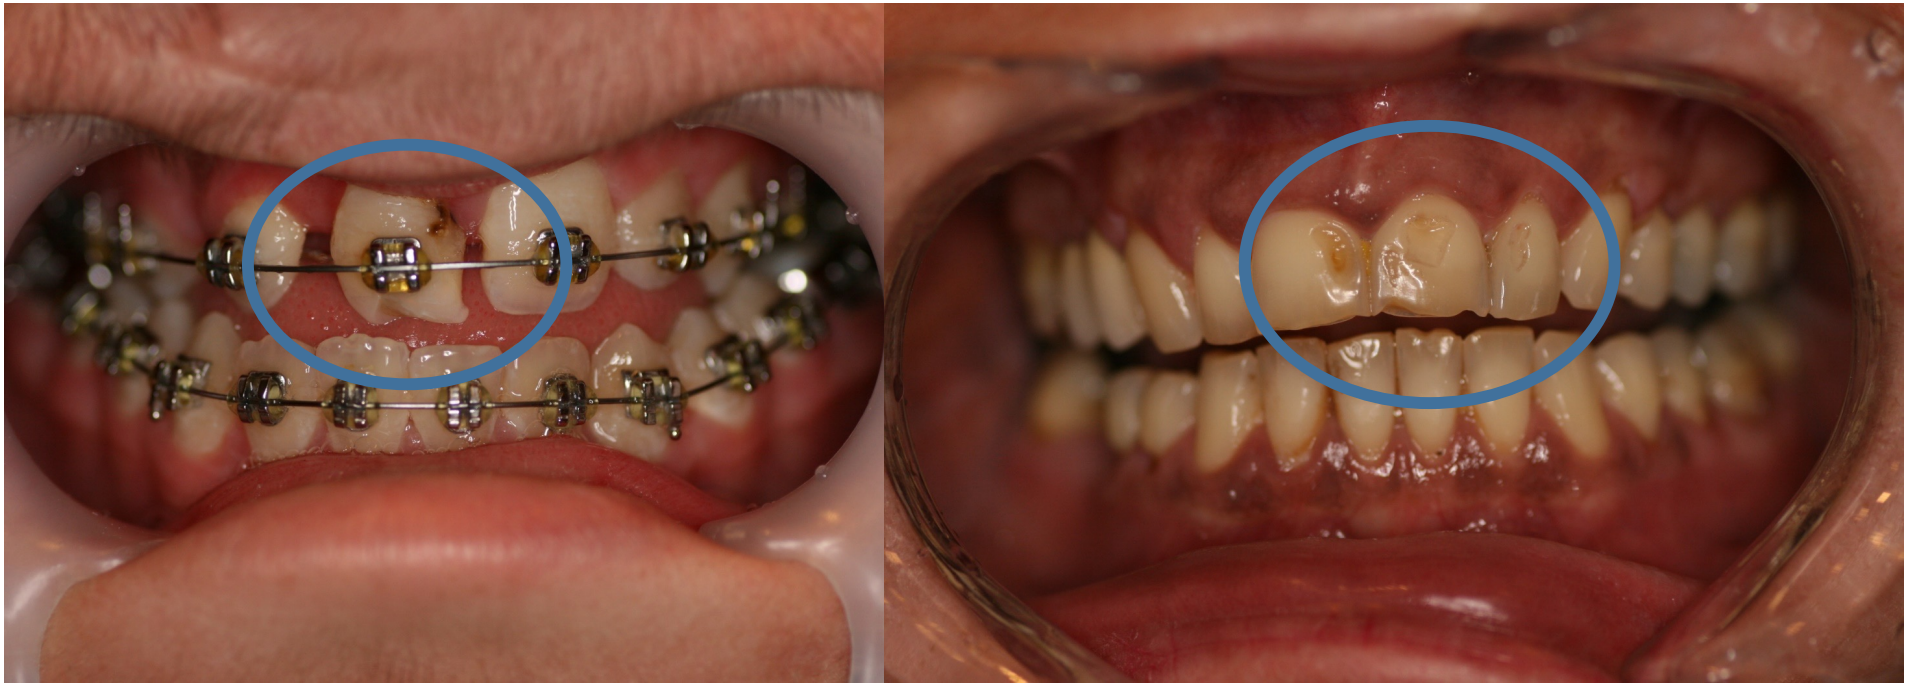



# Hypoplasia

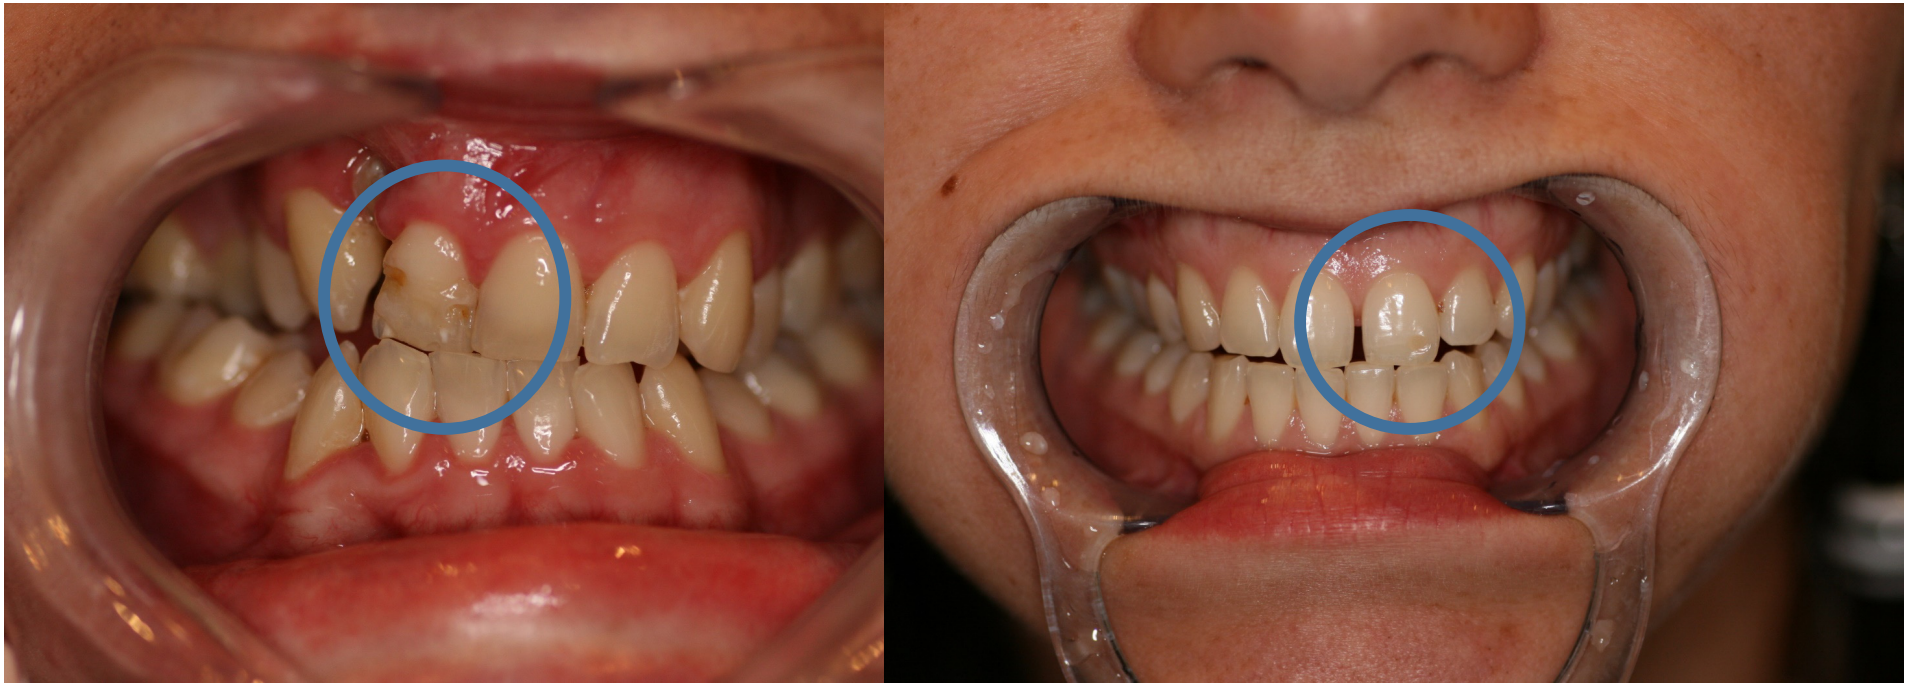

# Hypocalcification

Areas of white opacity on the tooth, not associated or directly adjacent to areas of decay

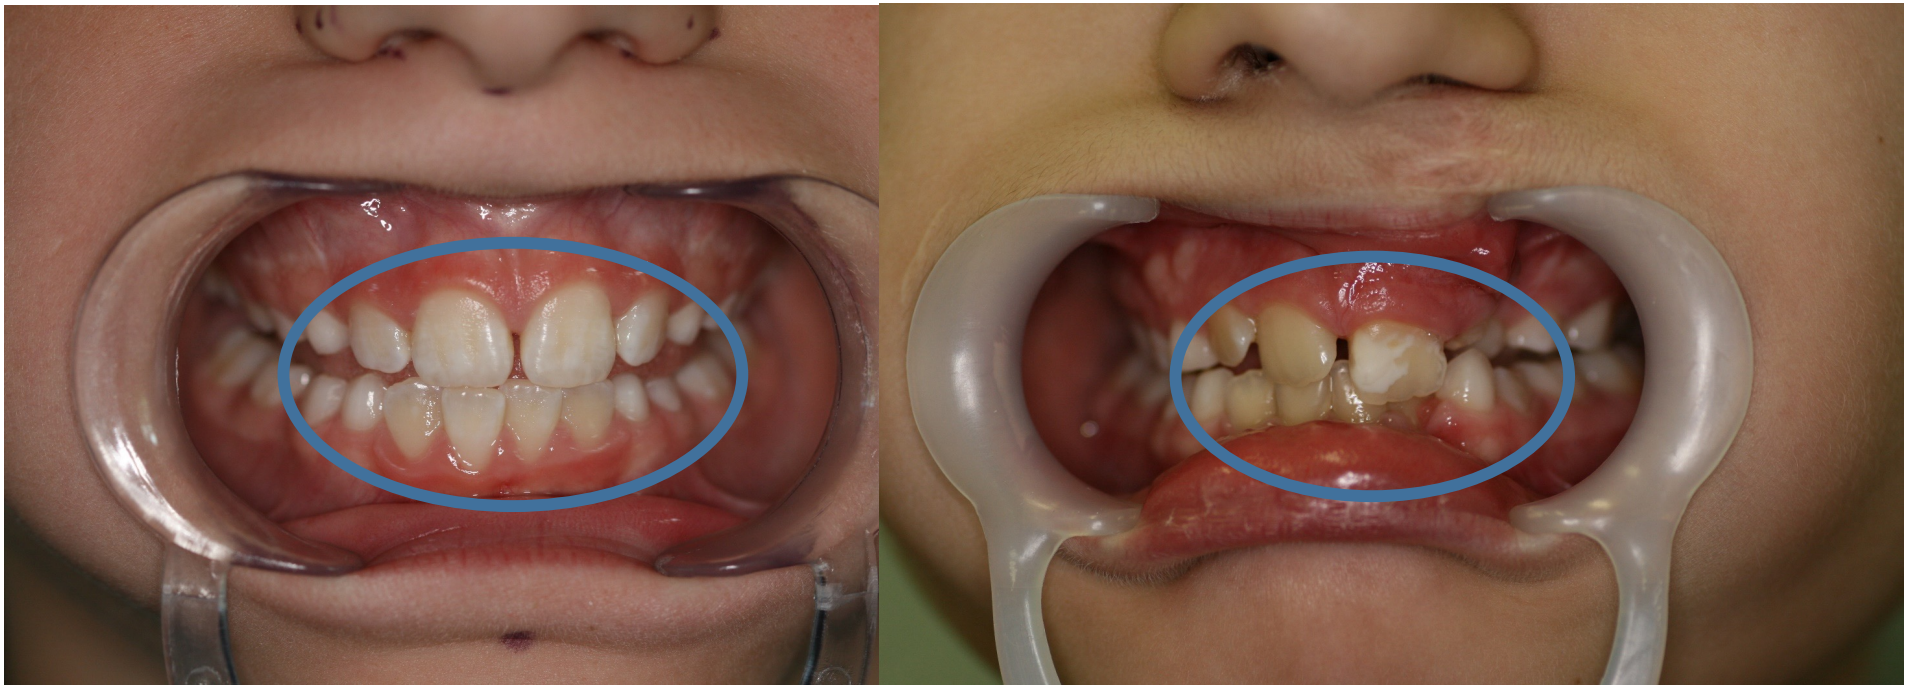

**Hypocalcification: defect in enamel characterized by reduced calcification**



# Hypocalcification

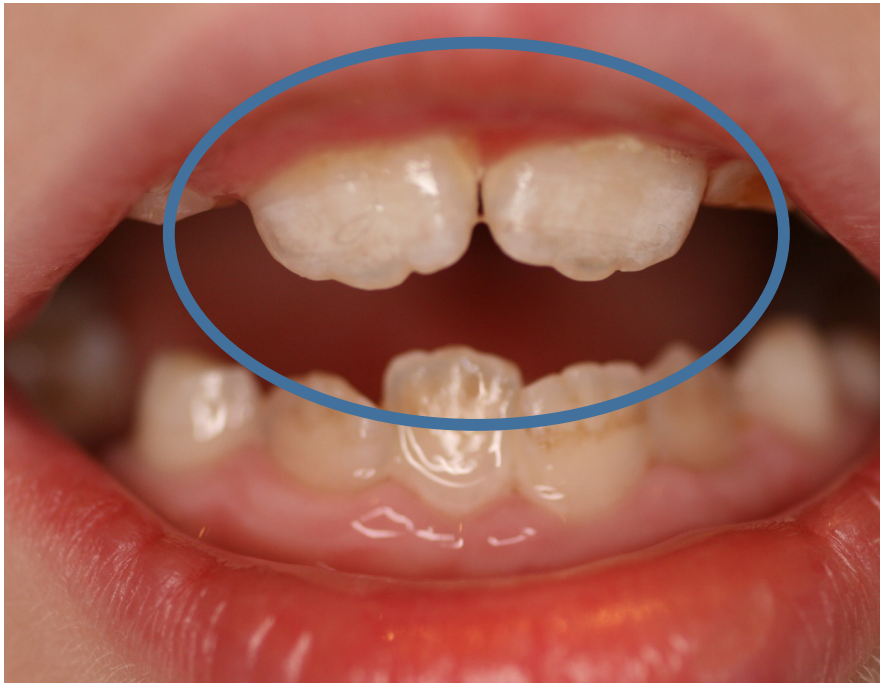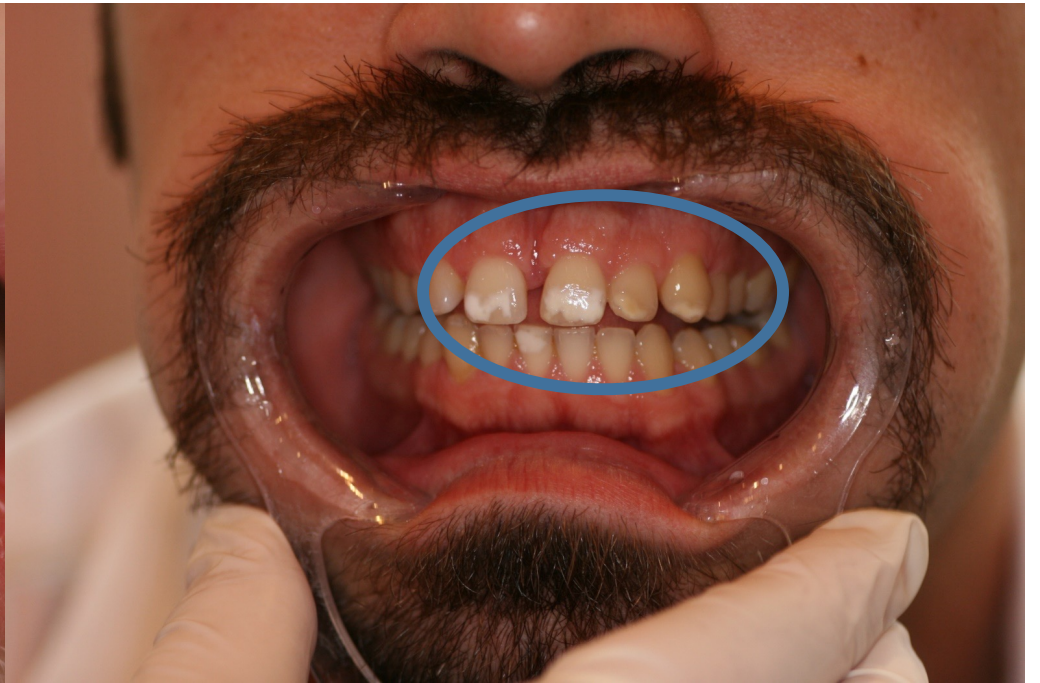

# Hypocalcification

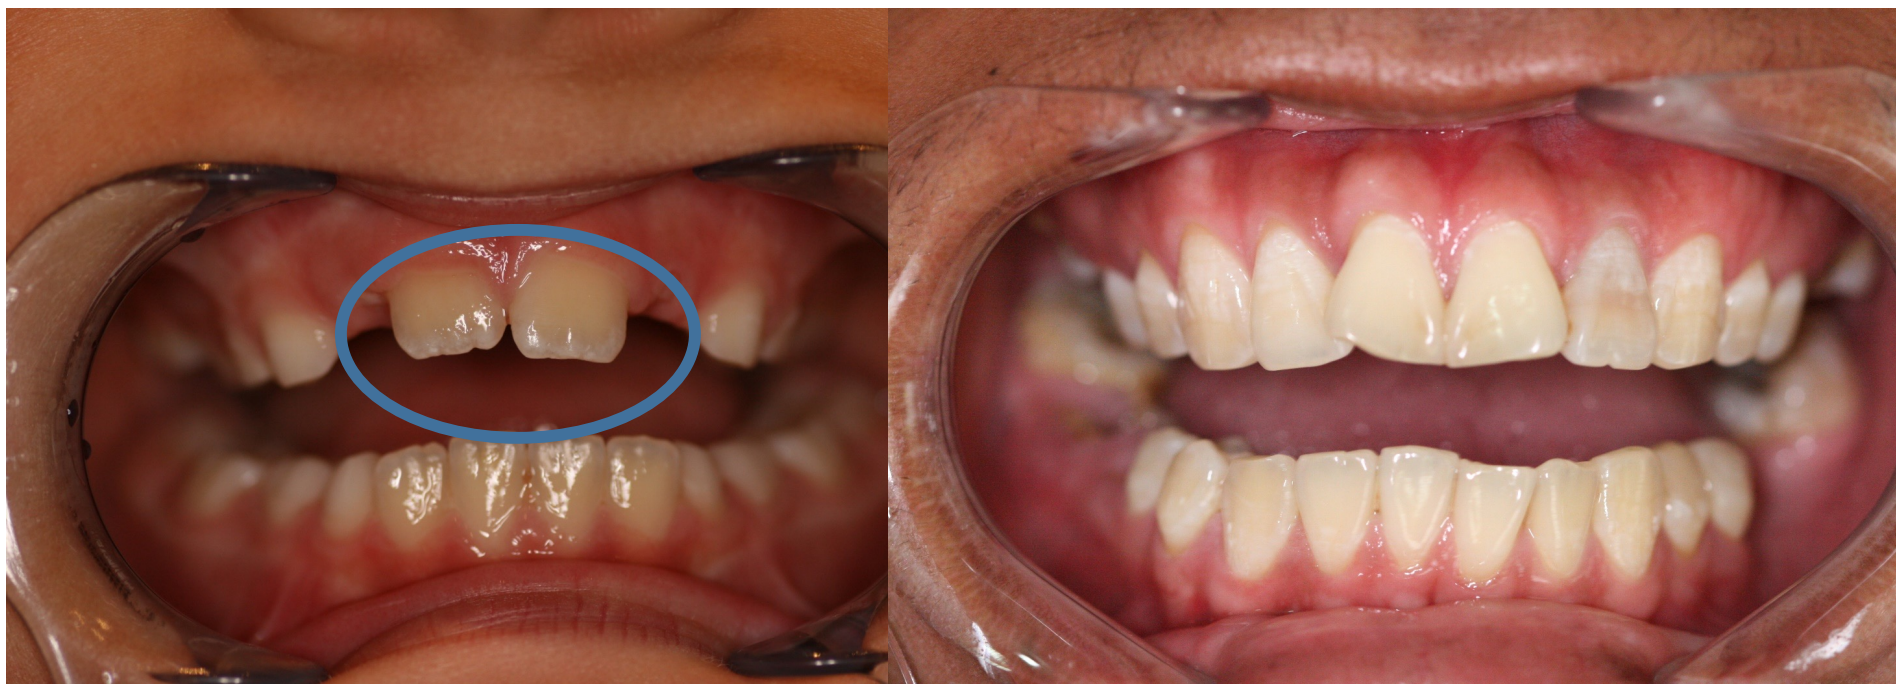

Supplement: NIHMS1788797-supplement-1.pdf [file NIHMS1788797-supplement-1.pdf]
